# Supplementary material
Source: Royal Society of Chemistry journal article supplement (doi:10.1039/d6tc00388e)
Supplement: d6tc00388e1.pdf [file d6tc00388e1.pdf]

## **A significant impact of nitrogen substitution on the solid state electronic structure: a case of 1,3,6,8-tetrakis(methylchalcogeno)-2,7-diazapyrene**

Krill Bulgarevich,<sup>a</sup> Kazuo Takimiya,<sup>a,b,c\*</sup>

<sup>a</sup> RIKEN Center for Emergent Matter Science (CEMS), 2-1 Hirosawa, Wako, Saitama 351-0198, Japan

<sup>b</sup> Tohoku University Advanced Institute for Materials Research (AIMR), 2-1-1 Katahira, Aoba-ku, Sendai, Miyagi 980-8577 Japan

<sup>c</sup> Department of Chemistry, Graduate School of Science, Tohoku University, 6-3 Aoba, Aramaki, Aoba-ku, Sendai, Miyagi 980-8578 Japan

### **Contents**

|                                                                                       |            |
|---------------------------------------------------------------------------------------|------------|
| <b>1. MO-azapyrene-based single-crystal transistor</b>                                | <b>S2</b>  |
| <b>2. Attempted synthesis of 1,3,6,8-tetrakis(methylthio)-2,7-diazapyrene from 1a</b> | <b>S1</b>  |
| <b>3. Crystallographic data</b>                                                       | <b>S2</b>  |
| <b>4. Physicochemical Characterization</b>                                            | <b>S5</b>  |
| <b>5. Characterization of charge transport</b>                                        | <b>S8</b>  |
| <b>6. Quadrupole moments calculated for MX-azapyrenes and MX-pyrenes</b>              | <b>S9</b>  |
| <b>7. NMR spectra</b>                                                                 | <b>S10</b> |
| <b>8. References</b>                                                                  | <b>S13</b> |

## 1. MO-azapyrene-based single-crystal transistor

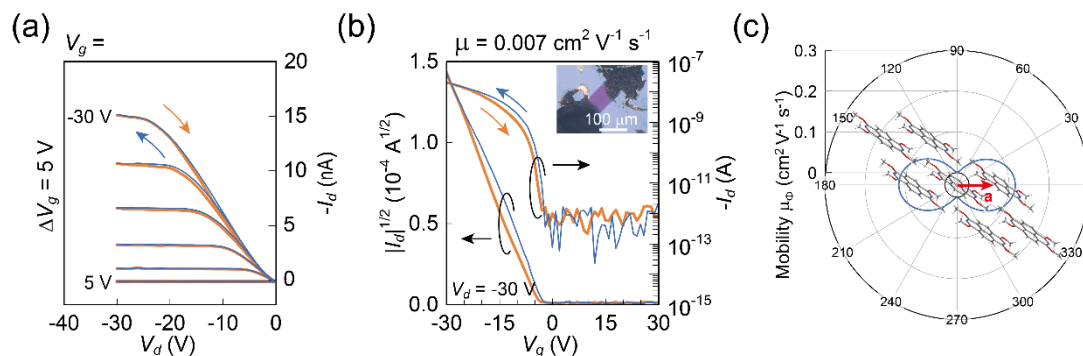

**Fig. S1.** (a) Output and (b) transfer characteristics of MO-azapyrene, and (c) simulated anisotropic mobility based on the hopping model.

## 2. Attempted synthesis of 1,3,6,8-tetrakis(methylthio)-2,7-diazapyrene from **1a**

A dry flask was charged with 1,3,6,8-tetra(pivaloxy)-2,7-diazapyrene (**1a**)<sup>1,2</sup> (0.05 g, 0.08 mmol) and dry *N,N*-dimethylformamide (DMF, 30 mL). Methyl 3-(methylthio)propionate (0.10 mL, 0.8 mmol) and potassium tert-butoxide (tBuOK, 0.15 g, 1.3 mmol) were added under a flow of nitrogen. The reaction mixture was stirred at 100 °C for 16 h. After cooling to room temperature, the mixture was poured into water (ca. 50 mL) and filtered. The formation of 1,3,6,8-tetrakis(methylthio)-2,7-diazapyrene was not confirmed by APCI mass spectroscopy.

A dry flask was charged with **1a** (0.05 g, 0.08 mmol) and tetrakis(triphenylphosphine)palladium(0) (Pd[PPh<sub>3</sub>]<sub>4</sub>, 0.02 g, 0.017 mmol). Dry toluene (30 mL) and tributyl(methylthio)stannane (MeS-SnBu<sub>3</sub>, 0.20 mL, 0.7 mmol) were added under a nitrogen atmosphere, and the reaction mixture was stirred at 120 °C for 16 h. After cooling to room temperature, the mixture was poured into methanol and filtered. The formation of 1,3,6,8-tetrakis(methylthio)-2,7-diazapyrene was not confirmed by APCI mass spectroscopy; a weak signal consistent with a mono-substituted product (1,3,6-tris(pivaloxy)-8-methylthio-2,7-diazapyrene) was observed.

### 3. Crystallographic data

**Table S1.** Crystallographic parameters of MT-azapyrene.

| Compound                  | MT-azapyrene                                                  | MT-azapyrene                                                  | MT-azapyrene                                                  |
|---------------------------|---------------------------------------------------------------|---------------------------------------------------------------|---------------------------------------------------------------|
| Temperature / K           | 300                                                           | 200                                                           | 100                                                           |
| Formula                   | C <sub>18</sub> H <sub>16</sub> N <sub>2</sub> S <sub>4</sub> | C <sub>18</sub> H <sub>16</sub> N <sub>2</sub> S <sub>4</sub> | C <sub>18</sub> H <sub>16</sub> N <sub>2</sub> S <sub>4</sub> |
| Molecular Weight          | 388.580                                                       | 388.580                                                       | 388.580                                                       |
| Crystal Habit             | plate                                                         | plate                                                         | plate                                                         |
| Crystal System            | <i>triclinic</i>                                              | <i>triclinic</i>                                              | <i>triclinic</i>                                              |
| Space Group               | <i>P</i> -1                                                   | <i>P</i> -1                                                   | <i>P</i> -1                                                   |
| <i>a</i> / Å              | 5.28031(8)                                                    | 5.24990(10)                                                   | 5.22870(10)                                                   |
| <i>b</i> / Å              | 10.53118(15)                                                  | 10.4549(2)                                                    | 10.4035(2)                                                    |
| <i>c</i> / Å              | 15.2990(2)                                                    | 15.2984(3)                                                    | 15.2739(3)                                                    |
| $\alpha$ / °              | 91.9773(12)                                                   | 93.4100(10)                                                   | 93.978(2)                                                     |
| $\beta$ / °               | 90.4976(13)                                                   | 90.930(2)                                                     | 91.140(2)                                                     |
| $\gamma$ / °              | 94.2773(12)                                                   | 93.8400(10)                                                   | 93.599(2)                                                     |
| <i>V</i> / Å <sup>3</sup> | 847.81(2)                                                     | 836.15(3)                                                     | 826.97(3)                                                     |
| <i>Z</i>                  | 2                                                             | 2                                                             | 2                                                             |
| <i>R</i>                  | 0.0432                                                        | 0.0382                                                        | 0.0482                                                        |
| <i>R</i> <sub>w</sub>     | 0.1266                                                        | 0.1088                                                        | 0.1478                                                        |
| GOF                       | 1.073                                                         | 1.064                                                         | 0.971                                                         |
| CCDC                      | 2528773                                                       | 2528774                                                       | 2528775                                                       |

**Table S2.** Crystallographic parameters of MS-azapyrene.

| Compound                  | MS-azapyrene                                                   | MS-azapyrene                                                   | MS-azapyrene                                                   |
|---------------------------|----------------------------------------------------------------|----------------------------------------------------------------|----------------------------------------------------------------|
| Temperature / K           | 300                                                            | 200                                                            | 100                                                            |
| Formula                   | C <sub>18</sub> H <sub>16</sub> N <sub>2</sub> Se <sub>4</sub> | C <sub>18</sub> H <sub>16</sub> N <sub>2</sub> Se <sub>4</sub> | C <sub>18</sub> H <sub>16</sub> N <sub>2</sub> Se <sub>4</sub> |
| Molecular Weight          | 576.224                                                        | 576.224                                                        | 576.224                                                        |
| Crystal Habit             | needle                                                         | needle                                                         | needle                                                         |
| Crystal System            | <i>triclinic</i>                                               | <i>triclinic</i>                                               | <i>triclinic</i>                                               |
| Space Group               | <i>P</i> -1                                                    | <i>P</i> -1                                                    | <i>P</i> -1                                                    |
| <i>a</i> / Å              | 5.3990(2)                                                      | 5.3724(2)                                                      | 5.3527(2)                                                      |
| <i>b</i> / Å              | 10.6215(4)                                                     | 10.5552(4)                                                     | 10.5040(2)                                                     |
| <i>c</i> / Å              | 15.7507(4)                                                     | 15.7113(3)                                                     | 15.6600(2)                                                     |
| $\alpha$ / °              | 95.774(3)                                                      | 96.178(2)                                                      | 96.335(2)                                                      |
| $\beta$ / °               | 91.532(3)                                                      | 91.672(2)                                                      | 91.735(2)                                                      |
| $\gamma$ / °              | 93.914(3)                                                      | 93.573(3)                                                      | 93.212(2)                                                      |
| <i>V</i> / Å <sup>3</sup> | 896.04(5)                                                      | 883.46(5)                                                      | 873.14(4)                                                      |
| <i>Z</i>                  | 2                                                              | 2                                                              | 2                                                              |
| <i>R</i>                  | 0.0482                                                         | 0.0481                                                         | 0.0463                                                         |
| <i>R</i> <sub>w</sub>     | 0.1387                                                         | 0.1427                                                         | 0.1334                                                         |
| GOF                       | 1.070                                                          | 1.059                                                          | 1.171                                                          |
| CCDC                      | 2528776                                                        | 2528777                                                        | 2528778                                                        |

**Table S3.** Crystallographic parameters of **2-5** and **1c**.

| Compound                  | <b>2</b>                                          | <b>3</b>                                                       | <b>4</b>                                                      | <b>5</b>                                                                      | <b>1c</b>                                                     |
|---------------------------|---------------------------------------------------|----------------------------------------------------------------|---------------------------------------------------------------|-------------------------------------------------------------------------------|---------------------------------------------------------------|
| Temperature / K           | 100                                               | 100                                                            | 100                                                           | 100                                                                           | 100                                                           |
| Formula                   | C <sub>7</sub> H <sub>6</sub> BrCl <sub>2</sub> N | C <sub>14</sub> H <sub>10</sub> Cl <sub>4</sub> N <sub>2</sub> | C <sub>14</sub> H <sub>8</sub> Cl <sub>4</sub> N <sub>2</sub> | C <sub>14</sub> H <sub>6</sub> Br <sub>2</sub> Cl <sub>4</sub> N <sub>2</sub> | C <sub>14</sub> H <sub>4</sub> Cl <sub>4</sub> N <sub>2</sub> |
| Molecular Weight          | 254.936                                           | 348.048                                                        | 346.032                                                       | 503.824                                                                       | 342.000                                                       |
| Crystal Habit             | block                                             | plate                                                          | plate                                                         | block                                                                         | needle                                                        |
| Crystal System            | <i>monoclinic</i>                                 | <i>triclinic</i>                                               | <i>monoclinic</i>                                             | <i>triclinic</i>                                                              | <i>triclinic</i>                                              |
| Space Group               | <i>P2<sub>1</sub>/n</i>                           | <i>P-1</i>                                                     | <i>P2<sub>1</sub>/c</i>                                       | <i>P-1</i>                                                                    | <i>P-1</i>                                                    |
| <i>a</i> / Å              | 10.5727(2)                                        | 3.8934(3)                                                      | 9.3169(5)                                                     | 9.7620(3)                                                                     | 3.7607(2)                                                     |
| <i>b</i> / Å              | 7.19410(10)                                       | 6.3538(3)                                                      | 22.5715(8)                                                    | 12.4337(4)                                                                    | 12.1745(5)                                                    |
| <i>c</i> / Å              | 12.6552(2)                                        | 14.2061(8)                                                     | 6.9712(3)                                                     | 20.1351(5)                                                                    | 13.3853(6)                                                    |
| $\alpha$ / °              | 90                                                | 92.601(4)                                                      | 90                                                            | 78.679(2)                                                                     | 95.130(4)                                                     |
| $\beta$ / °               | 112.668(2)                                        | 92.457(5)                                                      | 111.748(6)                                                    | 79.088(2)                                                                     | 92.479(4)                                                     |
| $\gamma$ / °              | 90                                                | 90.210(4)                                                      | 90                                                            | 85.072(2)                                                                     | 97.667(4)                                                     |
| <i>V</i> / Å <sup>3</sup> | 888.21(3)                                         | 350.74(4)                                                      | 1361.66(12)                                                   | 2350.06(12)                                                                   | 603.984                                                       |
| <i>Z</i>                  | 4                                                 | 1                                                              | 4                                                             | 6                                                                             | 2                                                             |
| <i>R</i>                  | 0.0311                                            | 0.0987                                                         | 0.0712                                                        | 0.0589                                                                        | 0.0854                                                        |
| <i>R<sub>w</sub></i>      | 0.0908                                            | 0.2858                                                         | 0.2009                                                        | 0.1414                                                                        | 0.2232                                                        |
| GOF                       | 1.091                                             | 1.085                                                          | 1.097                                                         | 1.033                                                                         | 1.122                                                         |
| CCDC                      | 2528768                                           | 2528769                                                        | 2528770                                                       | 2528771                                                                       | 2528772                                                       |

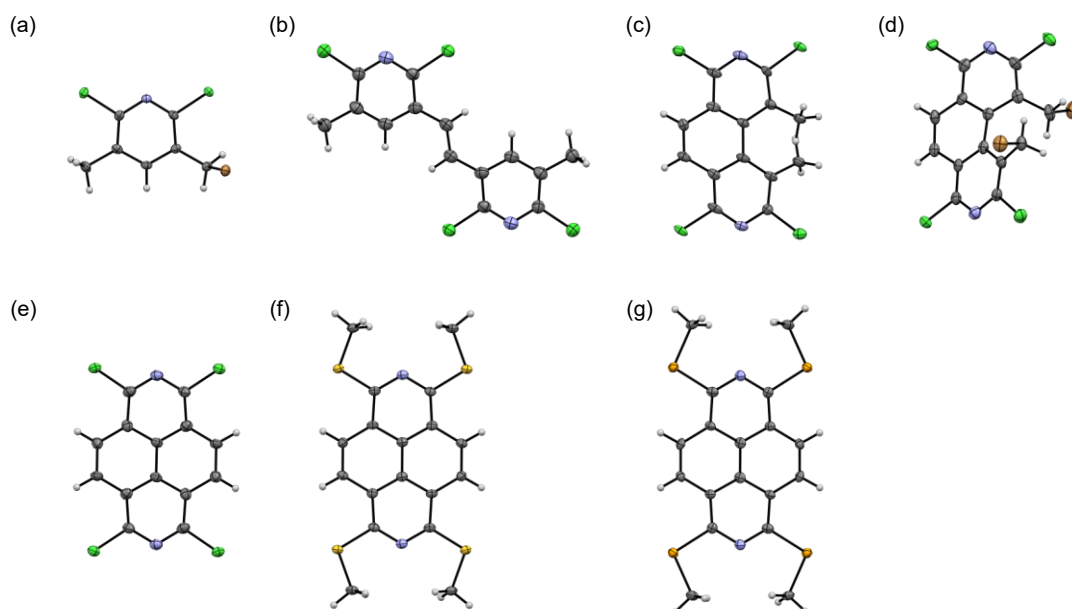**Fig. S2.** Molecular structures of (a) **2**, (b) **3**, (c) **4**, (d) **5**, (e) **1c**, (f) MT-azapyrene, and (g) MS-azapyrene, determined by single-crystal XRD.

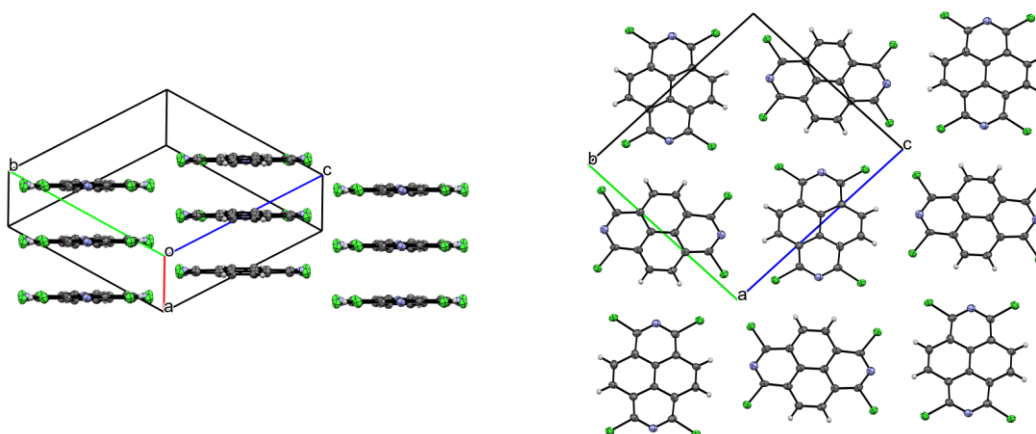

**Fig. S3.** Side (left) and top (right) view of the crystal structure of **1c**.

#### 4. Physicochemical characterization

The molecular properties were evaluated by photoemission yield spectroscopy in air (Fig. S4), and UV-vis absorption spectra (Fig. S5), together with DFT calculations (Fig. S6). Due to the low solubility of the MX-azapyrenes, their HOMO energy levels were estimated from ionization potentials measured in the crystalline state. The optical band gaps ( $E_g$ ) were estimated from the absorption onset energies.

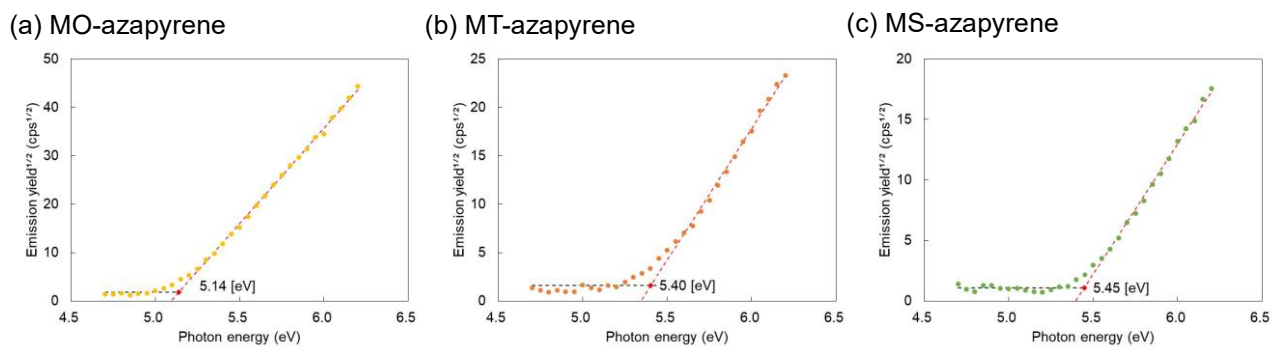

**Fig. S4.** Ionization potentials of (a) MO-, (b) MT, and (c) MS-azapyrene measured in air on a RIKEN-Keiki AC-2 system.

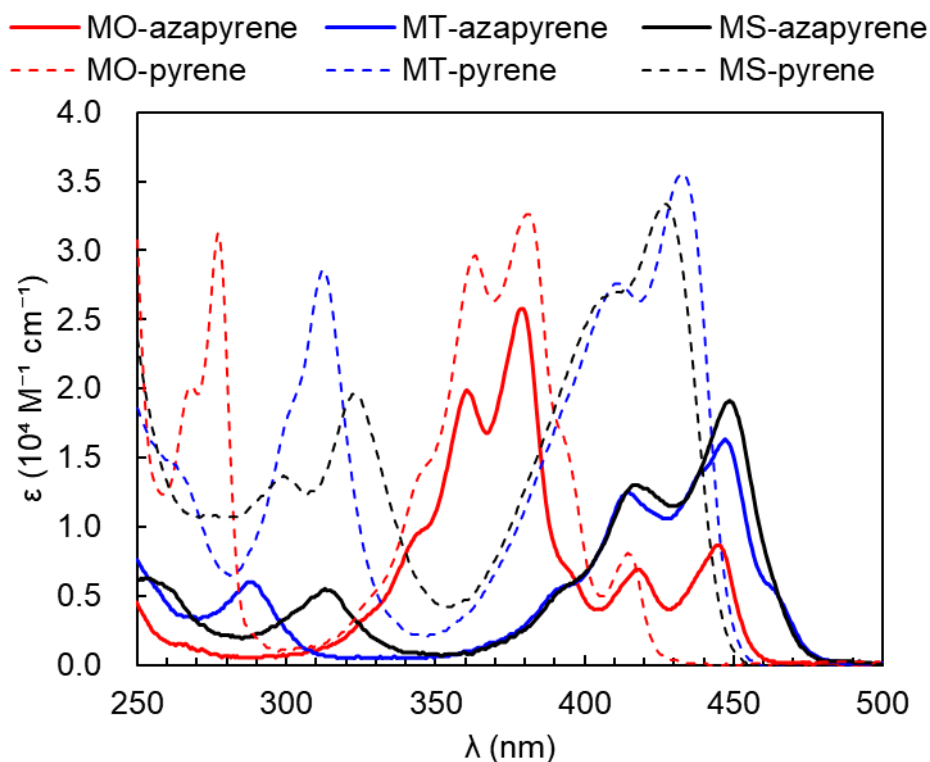

**Fig. S5.** UV-vis absorption spectra of MO-, MT-, and MS-azapyrene (solid lines) and MO-, MT-, MS-pyrene (dashed lines) in dichloromethane.

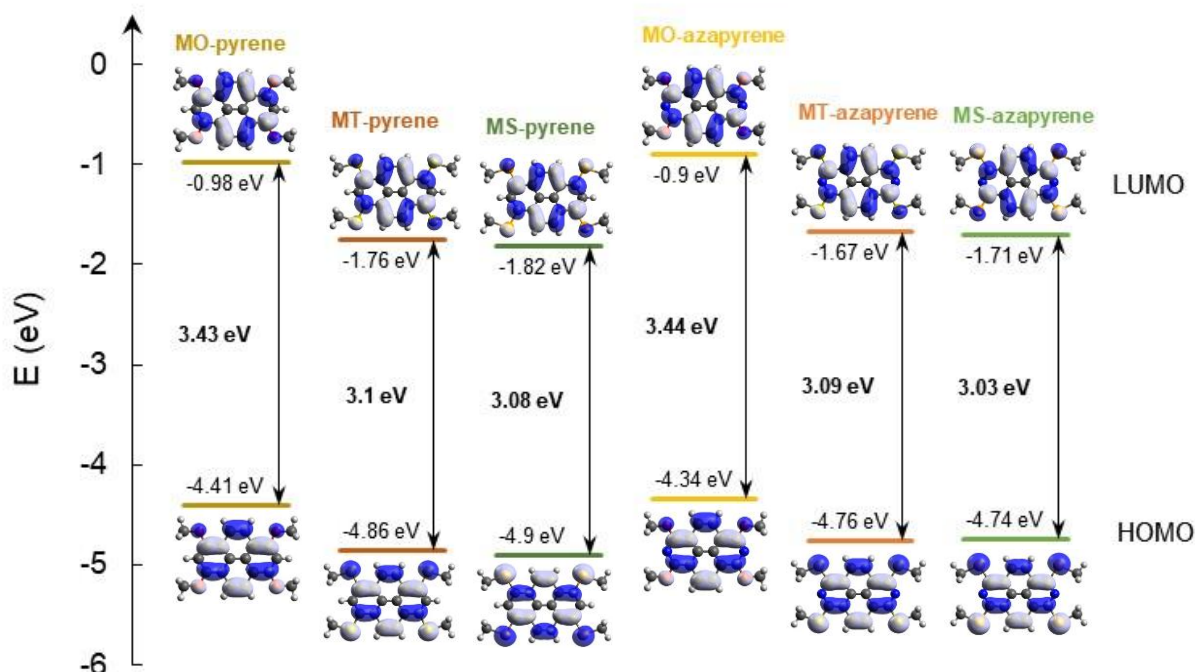

**Fig. S6.** Comparison of energy levels and frontier orbitals (HOMO and LUMO) for MO-, MT-, and MS-pyrenes and azapyrenes, calculated by the DFT methods at B3LYP/6-311G(d,p) level.

**Table S4.** Molecular electronic properties of MO-, MT-, and MS-azapyrene.

|              | IP (eV) <sup>a</sup> | $\lambda_{\max}$ (nm) / $\epsilon$ ( $\times 10^4$ ) | $\lambda_{\text{onset}}$ (nm) / $E_g$ (eV) <sup>b</sup> | $E_{\text{HOMO}}/E_{\text{LUMO}}$ (eV) <sup>c</sup> |
|--------------|----------------------|------------------------------------------------------|---------------------------------------------------------|-----------------------------------------------------|
| MO-azapyrene | 5.14                 | 445 / 0.86                                           | 457 / 2.71                                              | -4.34/-0.90                                         |
| MT-azapyrene | 5.40                 | 446 / 1.63                                           | 476 / 2.61                                              | -4.76/-1.67                                         |
| MS-azapyrene | 5.45                 | 449 / 1.91                                           | 474 / 2.62                                              | -4.74/-1.71                                         |

<sup>a</sup> Determined from the onset potential in photoemission yield spectroscopy in air. <sup>b</sup> Optical bandgap determined from the onset of absorption spectra. <sup>c</sup> Obtained from theoretical calculations by the DFT method.

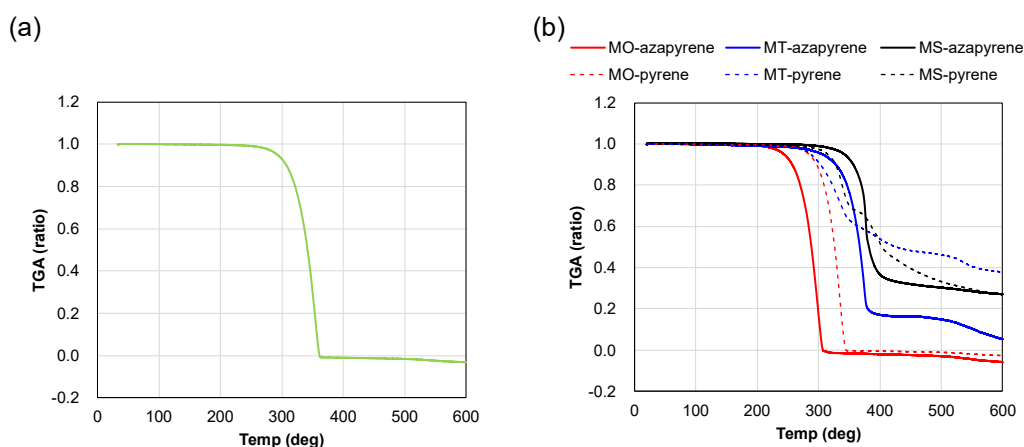**Fig. S7.** Thermogravimetric analysis of (a) **1c** and (b) MO-, MT-, and MS-azapyrene (solid lines) and MO-, MT-, MS-pyrene (dashed lines), measured in nitrogen at a heating rate of 5 °C min<sup>-1</sup>.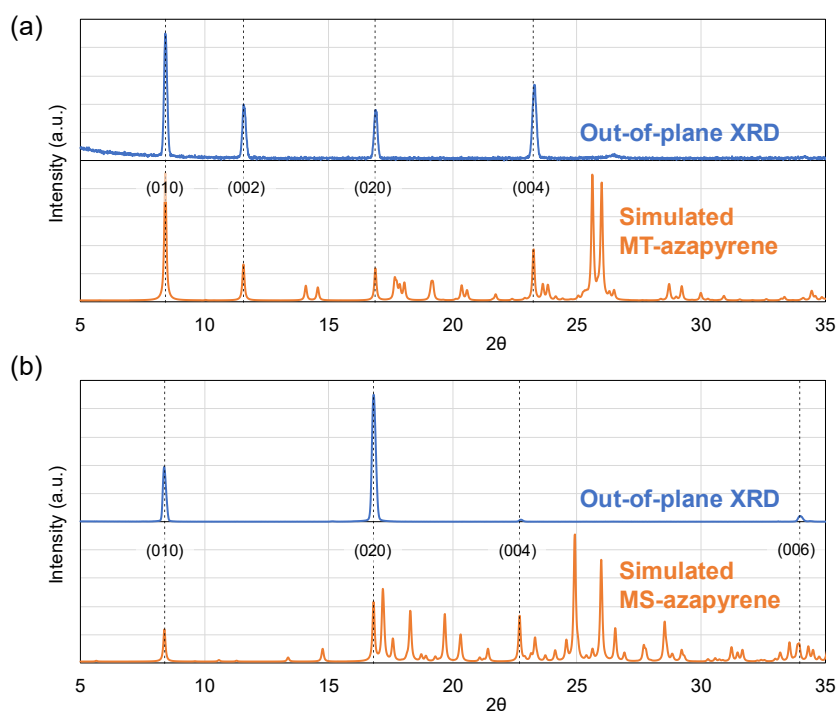**Fig. S8.** Out-of-plane XRD of (a) MT- and (b) MS-azapyrene single-crystals transferred onto CYTOP / SiO<sub>2</sub> surface.

## 5. Characterization of charge transport

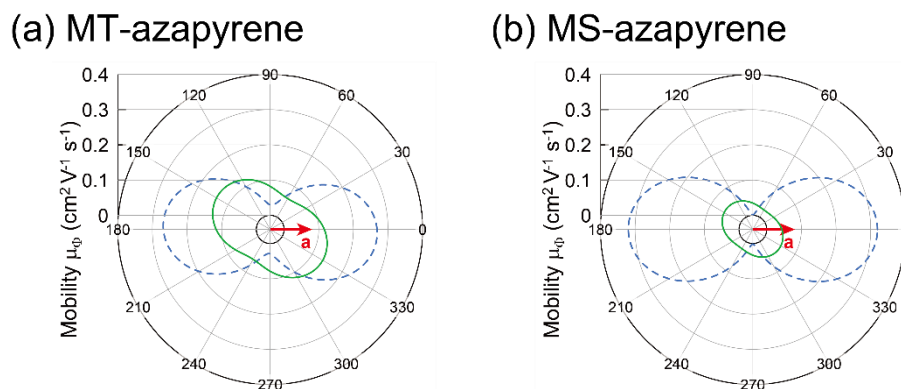

**Fig. S9.** Mobility orientation function calculated for MT- and MS-azapyrene using transfer integrals evaluated for two non-equivalent  $\pi$ -stacking layers (solid and dashed lines).

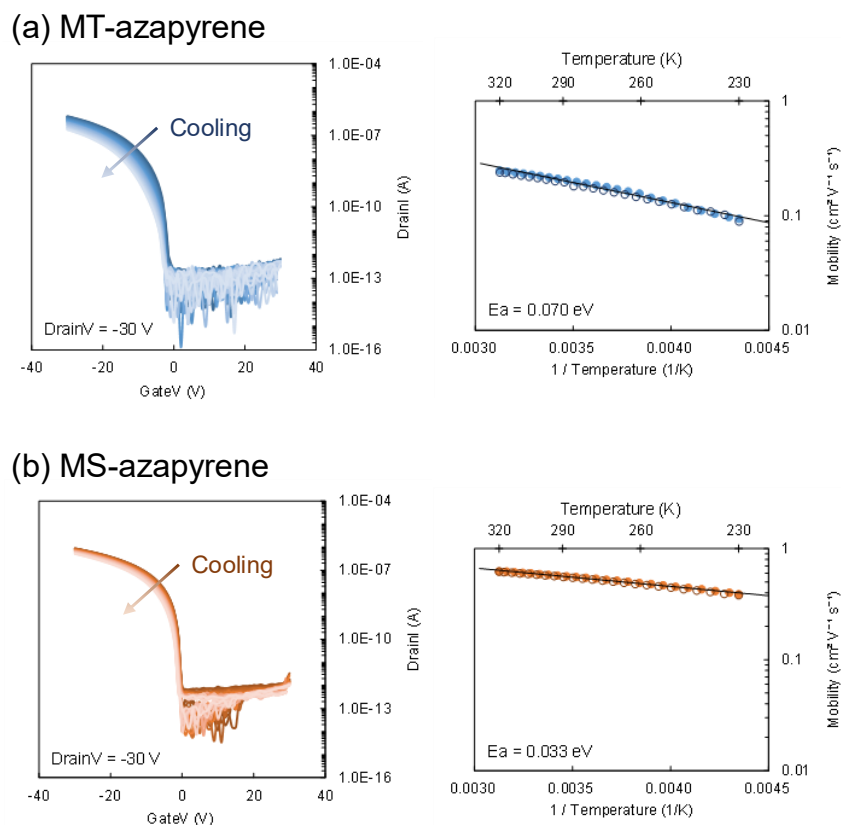

**Fig. S10.** Temperature dependence of transfer characteristics and carrier mobility of (a) MT- and (b) MS-azapyrene measured in vacuum ( $<1$  Pa). Filled and open markers in the right figures represent mobilities extracted from the cooling and heating cycles, respectively. The estimated activation energy values are indicated.

## 6. Quadrupole moments calculated for MX-azapyrenes and MX-pyrenes

**Table S5.** Quadrupole moments<sup>3</sup> calculated for MX-azapyrenes and MX-pyrenes using the Gaussian16 program at B3LYP/6-31G(d,p) level. The molecules were placed at the origin of the xy-plane so that their long axes were aligned with the *x*-axis.

| Compound     | $Q_{xx}$ | $Q_{yy}$ | $Q_{zz}$ | $Q_{yy}/Q_{xx}$ |
|--------------|----------|----------|----------|-----------------|
| MO-azapyrene | 37.29    | -13.91   | -23.39   | -0.373          |
| MT-azapyrene | 43.67    | -19.01   | -24.66   | -0.435          |
| MS-azapyrene | 41.77    | -16.01   | -25.76   | -0.383          |
| MO-pyrene    | 24.55    | -8.53    | -16.02   | -0.347          |
| MT-pyrene    | 29.31    | -12.23   | -17.09   | -0.417          |
| MS-pyrene    | 28.16    | -9.80    | -18.36   | -0.348          |

## 7. NMR spectra

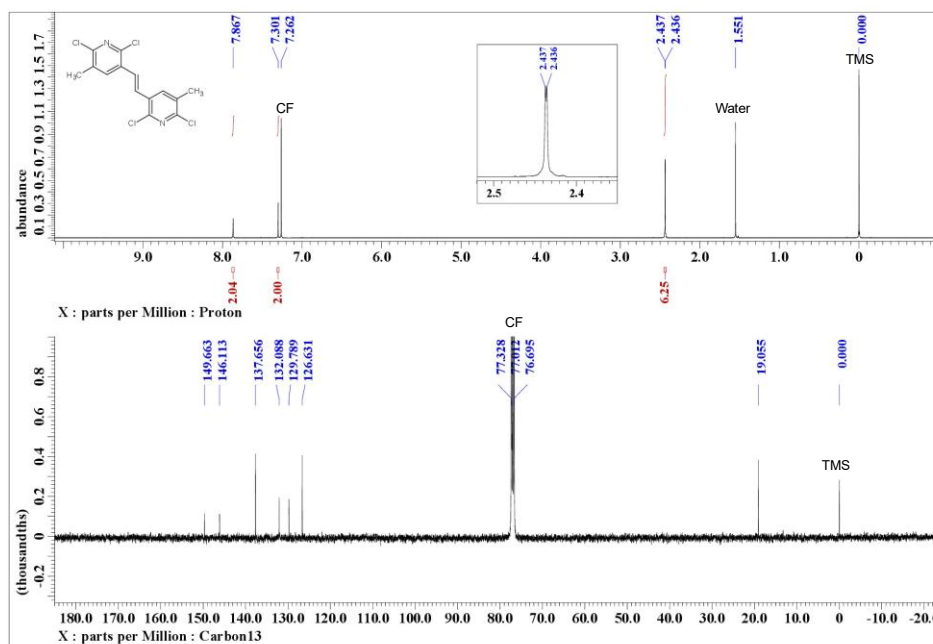

**Fig. S11.**  $^1\text{H}$  (top) and  $^{13}\text{C}$  (bottom) NMR spectra of 1,2-bis(2,6-dichloro-5-methylpyridin-3-yl)ethene (3) in  $\text{CDCl}_3$ .

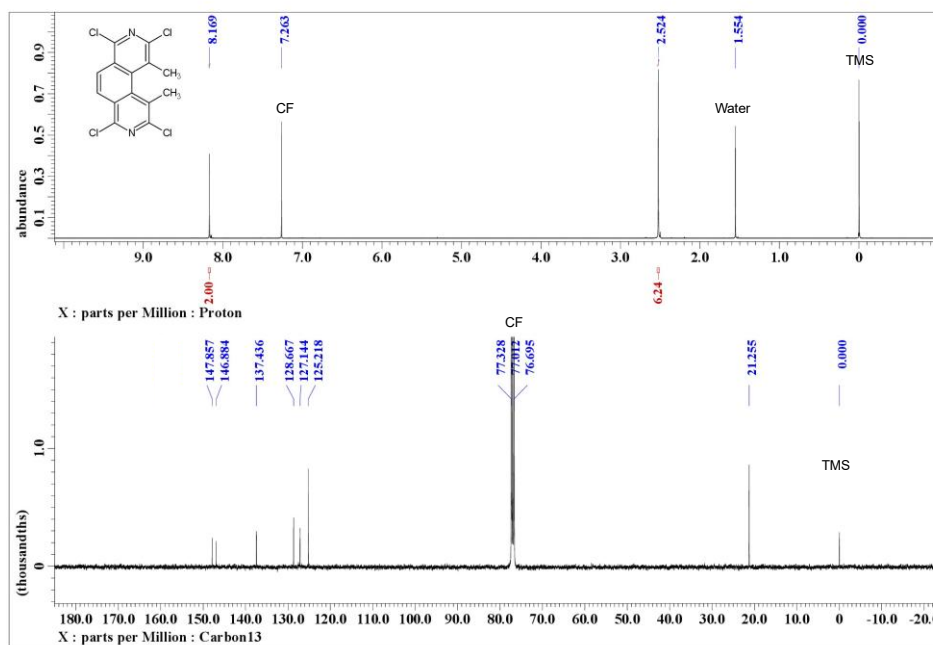

**Fig. S12.**  $^1\text{H}$  (top) and  $^{13}\text{C}$  (bottom) NMR spectra of 2,4,7,9-tetrachloro-1,10-dimethyl-3,8-phenanthroline (4) in  $\text{CDCl}_3$ .

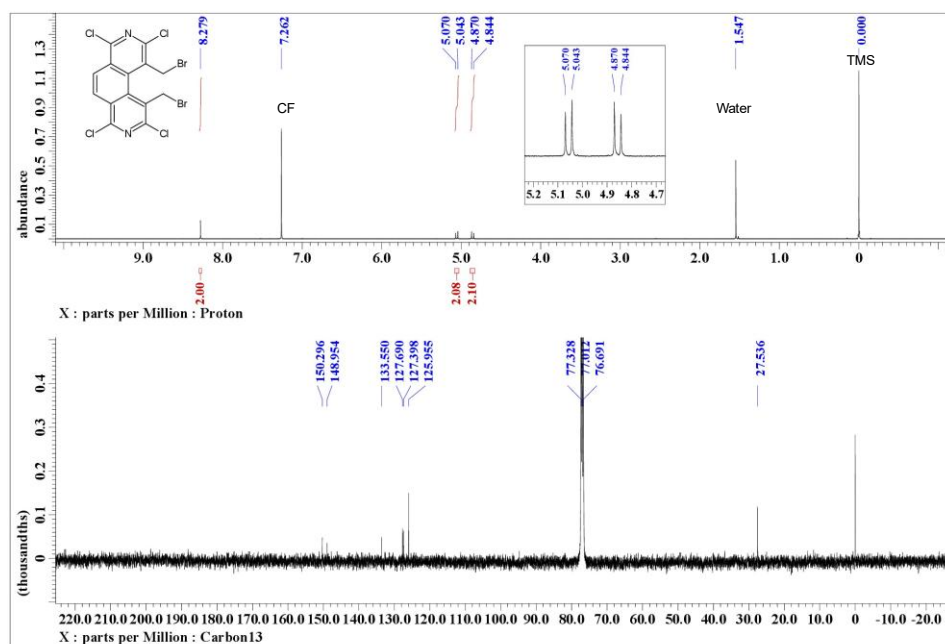

**Fig. S13.** <sup>1</sup>H (top) and <sup>13</sup>C (bottom) NMR spectra of 1,10-bis(bromomethyl)-2,4,7,9-tetrachloro-3,8-phenanthroline (**5**) in CDCl<sub>3</sub>.

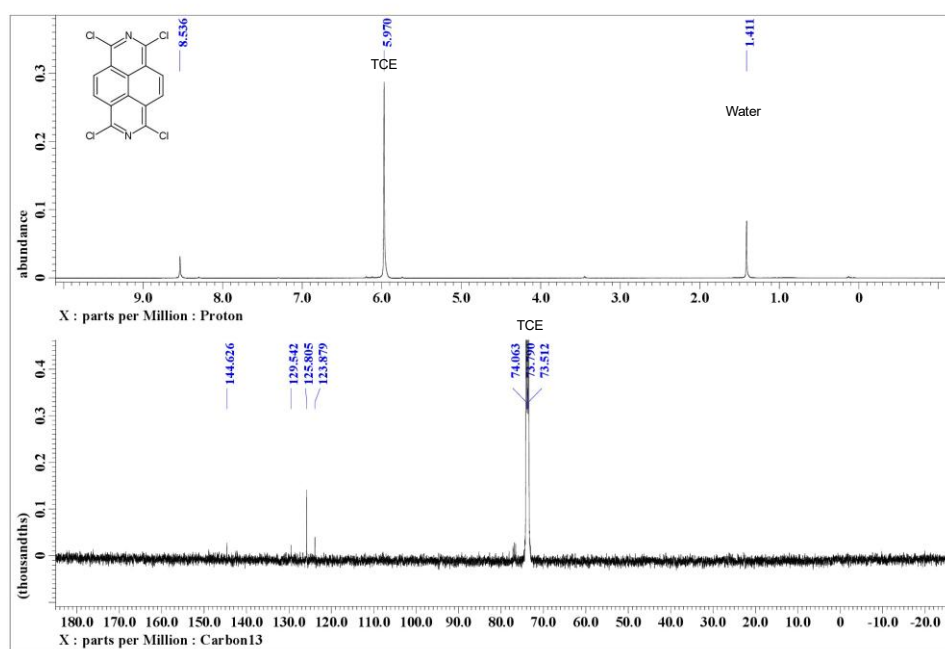

**Fig. S14.** <sup>1</sup>H (top) and <sup>13</sup>C (bottom) NMR spectra of 1,3,6,8-tetrachloro-2,7-diazapyrene (**1c**) in 1,1,2,2-tetrachloroethane-*d*<sub>2</sub> at 130 °C.

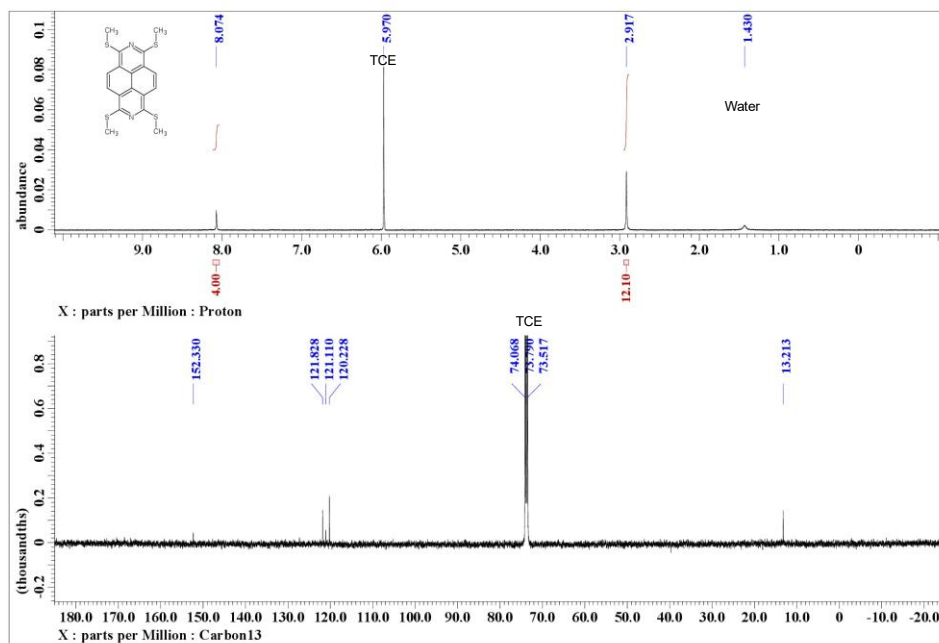

**Fig. S15.** <sup>1</sup>H (top) and <sup>13</sup>C (bottom) NMR spectra of 1,3,6,8-tetrakis(methylthio)-2,7-diazapyrene (MT-azapyrene) in 1,1,2,2-tetrachloroethane-*d*<sub>2</sub> at 120 °C.

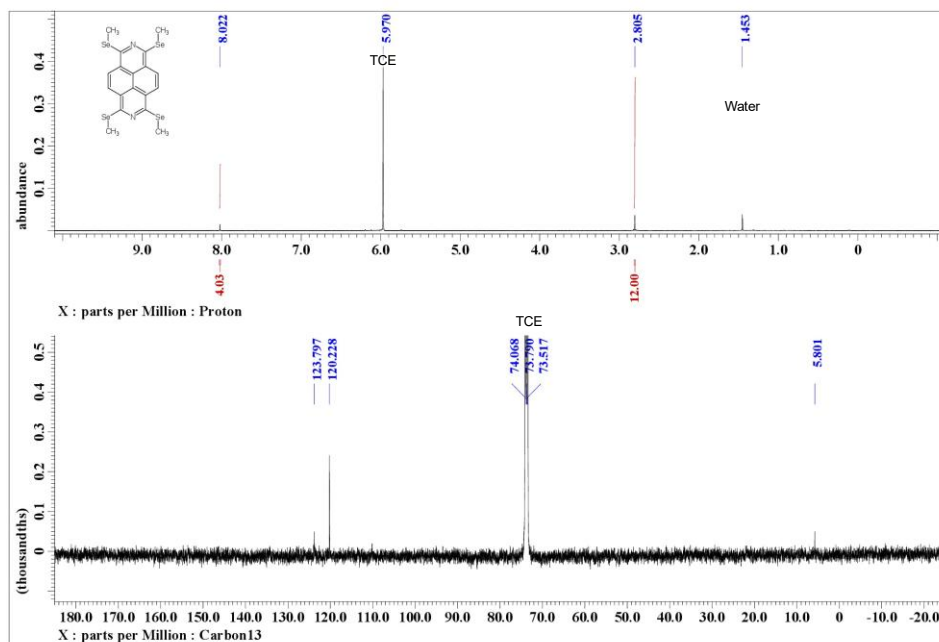

**Fig. S16.** <sup>1</sup>H (top, 100°C) and <sup>13</sup>C (bottom, 130 °C) NMR spectra of 1,3,6,8-tetrakis(methylseleno)-2,7-diazapyrene (MS-azapyrene) in 1,1,2,2-tetrachloroethane-*d*<sub>2</sub>.

## 8. References

1. T. Nakazato, T. Kamatsuka, J. Inoue, T. Sakurai, S. Seki, H. Shinokubo and Y. Miyake, The reductive aromatization of naphthalene diimide: a versatile platform for 2,7-diazapyrenes, *Chem. Commun.*, 2018, **54**, 5177-5180.
2. T. Nakazato, W. Matsuda, T. Sakurai, S. Seki, H. Shinokubo and Y. Miyake, Synthesis and Crystal Packing Structures of 2,7-Diazapyrenes with Various Alkyl Groups at 1,3,6,8-Positions, *Chem. Lett.*, 2020, **49**, 465-468.
3. T. Mori, Quadrupole moments determine the crystal structures of organic semiconductors, *J. Mater. Chem. C*, 2025, **13**, 17078-17093.
